# Supplementary material for: Facile synthesis of hierarchically porous Li4Ti5O12 microspheres for high rate lithium ion batteries
Source: Royal Society of Chemistry journal article supplement (doi:10.1039/c0jm00348d), 2010-01-01
Supplement: c0jm00348d.pdf [file c0jm00348d.pdf]

## Electronic Supplementary Information (ESI)

### Facile Synthesis of Hierarchically Porous $\text{Li}_4\text{Ti}_5\text{O}_{12}$ Microspheres for High Rate Lithium Ion Batteries

Laifa Shen<sup>a</sup>, Changzhou Yuan<sup>b</sup>, Hongjun Luo<sup>a</sup>, Xiaogang Zhang<sup>\*a</sup>,  
Ke Xu<sup>a</sup> and Yongyao Xia<sup>c</sup>

a College of Material Science & Engineering, Nanjing University of Aeronautics and  
Astronautics, Nanjing, 210016, P.R. China.

b School of materials Science and Engineering, Anhui University of technology,  
Maanshan, 243002, P.R. China.

c Department of Chemistry, Fudan University, Shanghai, 200433, P.R. China

E-mail: [azhangxg@163.com](mailto:azhangxg@163.com)

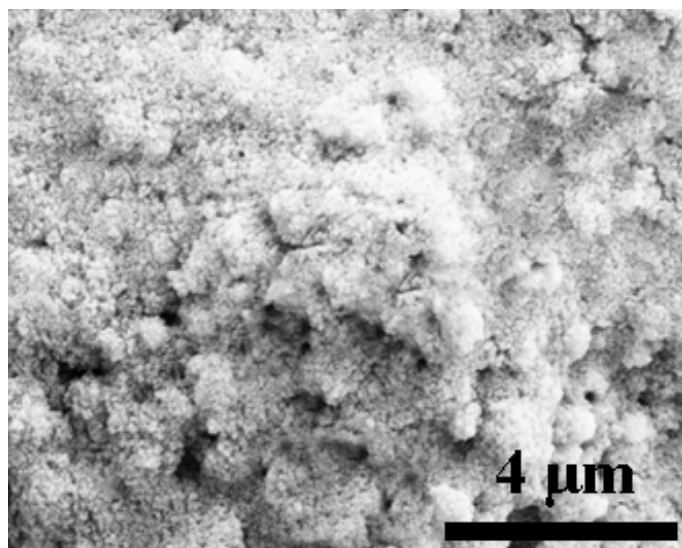

**Fig. S1** SEM image of primary  $\text{TiO}_2$  powder

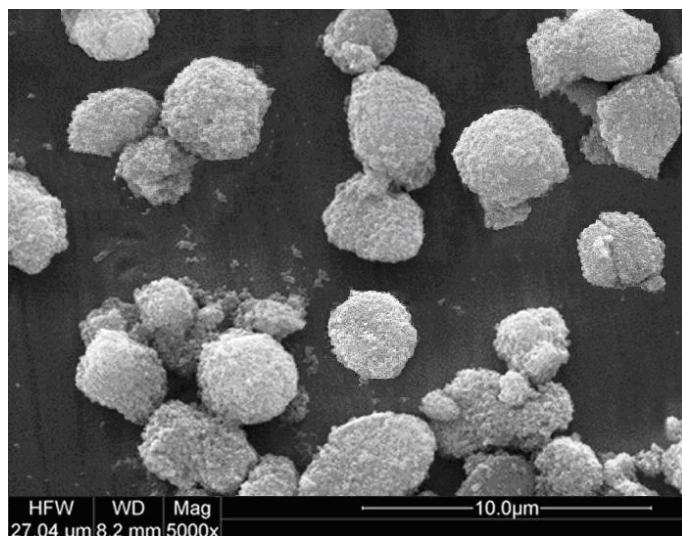

**Fig. S2** Low-magnification SEM image of  $\text{Li}_4\text{Ti}_5\text{O}_{12}$  sample synthesized by calcinating the intermediate phase at  $700\text{ }^\circ\text{C}$
